# Supplementary material for: DLK1/DIO3 locus upregulation by a β-catenin-dependent enhancer drives cell proliferation and liver tumorigenesis
Source: PubMed Central journal article supplement — Mol Ther. 2024 Feb 3;32(4):1125–43. doi: 10.1016/j.ymthe.2024.01.036 (PMC11163201; doi:10.1016/j.ymthe.2024.01.036), 2024-02-03
Supplement: mmc1.pdf [file mmc1.pdf]

## Supplemental Information

### ***DLK1/DIO3* locus upregulation**

**by a  $\beta$ -catenin-dependent enhancer drives cell  
proliferation and liver tumorigenesis**

**Julie Sanceau, Lucie Poupel, Camille Joubel, Isabelle Lagoutte, Stefano Caruso, Sandra Pinto, Christèle Desbois-Mouthon, Cécile Godard, Akila Hamimi, Enzo Montmory, Cécile Dulary, Sophie Chantalat, Amélie Roehrig, Kevin Muret, Benjamin Saint-Pierre, Jean-François Deleuze, Sophie Mouillet-Richard, Thierry Forné, Christophe F. Grosset, Jessica Zucman-Rossi, Sabine Colnot, and Angélique Gougelet**

## Supplemental material

**Table S1: Top 20 overexpressed RNAs in  $Apc^{\Delta hep}$  versus wild-type or  $\beta$ catenin $^{\Delta hep}$  hepatocytes from RNAseq data.** Results are represented as the log<sub>2</sub> fold induction in  $Apc^{\Delta hep}$  versus wt hepatocytes (second column) and versus  $\beta$ -catenin $^{\Delta hep}$  ( $\beta$ cat $^{\Delta hep}$ ) hepatocytes (fourth column) with their respective pvalue (pval). RNAs produced from the *Dlk1/Dio3* locus are indicated in bold and grey.

| gene        | Log <sub>2</sub> $Apc^{\Delta hep}$ / wt | pval           | Log <sub>2</sub> $Apc^{\Delta hep}/\beta$ cat $^{\Delta hep}$ | pval           |
|-------------|------------------------------------------|----------------|---------------------------------------------------------------|----------------|
| Eln         | 10.6                                     | 5.9E-42        | 20.0                                                          | 1.0E-50        |
| Wisp2       | 9.3                                      | 1.0E-50        | 10.8                                                          | 1.0E-50        |
| Akr1c18     | 7.8                                      | 4.0E-16        | 7.7                                                           | 2.8E-23        |
| <b>Rian</b> | <b>7.6</b>                               | <b>1.0E-50</b> | <b>20.0</b>                                                   | <b>1.0E-50</b> |
| Nkd1        | 7.5                                      | 1.0E-50        | 7.4                                                           | 1.0E-50        |
| AK133155    | 7.3                                      | 1.1E-27        | 7.8                                                           | 1.0E-43        |
| Slpi        | 7.1                                      | 1.0E-50        | 7.2                                                           | 1.0E-50        |
| <b>Rtl1</b> | <b>6.8</b>                               | <b>7.1E-10</b> | <b>20.0</b>                                                   | <b>4.4E-15</b> |
| Akr1b7      | 6.6                                      | 1.0E-50        | 8.4                                                           | 1.0E-50        |
| <b>Meg3</b> | <b>6.5</b>                               | <b>1.0E-50</b> | <b>13.5</b>                                                   | <b>1.0E-50</b> |
| Pkp1        | 6.5                                      | 7.0E-13        | 20.0                                                          | 7.4E-21        |
| Prom1       | 6.5                                      | 2.1E-13        | 5.9                                                           | 2.1E-18        |
| Prr18       | 6.4                                      | 7.3E-13        | 20.0                                                          | 9.6E-21        |
| Kif26b      | 6.2                                      | 5.3E-38        | 9.7                                                           | 1.0E-50        |
| Trib2       | 6.1                                      | 4.0E-31        | 6.7                                                           | 1.0E-50        |
| BC023483    | 6.1                                      | 4.3E-02        | 5.0                                                           | 4.2E-02        |
| <b>Mirg</b> | <b>6.1</b>                               | <b>4.5E-26</b> | <b>20.0</b>                                                   | <b>1.0E-50</b> |
| Reep1       | 6.1                                      | 1.7E-14        | 6.7                                                           | 4.6E-22        |
| Ihh         | 6.1                                      | 6.5E-30        | 9.2                                                           | 1.0E-50        |
| Elovl7      | 5.9                                      | 3.2E-06        | 20.0                                                          | 1.5E-09        |

**Table S2: Top 20 overexpressed miRNAs in  $Apc^{\Delta hep}$  versus wt hepatocytes from small-RNaseq data.** Results are represented as the log<sub>2</sub> fold induction in  $Apc^{\Delta hep}$  versus wt hepatocytes (second column) or versus  $\beta cat^{\Delta hep}$  (fourth column) with their respective adjusted pvalue (padj). MiRNAs produced from the *Dlk1/Dio3* locus are indicated in bold and grey.

| miRNA                 | Log <sub>2</sub> $Apc^{\Delta hep}$ / wt | padj    | Log <sub>2</sub> $Apc^{\Delta hep}/\beta cat^{\Delta hep}$ | padj            |
|-----------------------|------------------------------------------|---------|------------------------------------------------------------|-----------------|
| <b>mmu-miR-341</b>    | 6.7                                      | 4.3E-31 | <b>7.0</b>                                                 | <b>1.8E-60</b>  |
| <b>mmu-miR-665</b>    | 6.7                                      | 4.5E-26 | <b>8.7</b>                                                 | <b>1.9E-53</b>  |
| <b>mmu-miR-136</b>    | 6.7                                      | 1.8E-69 | <b>8.2</b>                                                 | <b>2.2E-140</b> |
| <b>mmu-miR-433</b>    | 6.4                                      | 1.7E-17 | <b>7.5</b>                                                 | <b>1.5E-29</b>  |
| <b>mmu-miR-377</b>    | 5.9                                      | 6.5E-07 | <b>10.0</b>                                                | <b>2.0E-09</b>  |
| <b>mmu-miR-329</b>    | 5.9                                      | 2.7E-07 | <b>5.0</b>                                                 | <b>7.6E-08</b>  |
| <b>mmu-miR-127</b>    | 5.9                                      | 2.9E-51 | <b>7.7</b>                                                 | <b>6.3E-130</b> |
| <b>mmu-miR-431</b>    | 5.8                                      | 3.6E-22 | <b>7.4</b>                                                 | <b>2.0E-47</b>  |
| <b>mmu-miR-370</b>    | 5.7                                      | 4.4E-18 | <b>7.4</b>                                                 | <b>1.5E-35</b>  |
| <b>mmu-miR-487b</b>   | 5.4                                      | 8.2E-11 | <b>5.5</b>                                                 | <b>1.7E-15</b>  |
| <b>mmu-miR-434-3p</b> | 5.4                                      | 4.3E-31 | <b>7.7</b>                                                 | <b>4.3E-92</b>  |
| <b>mmu-miR-496</b>    | 5.4                                      | 6.1E-08 | <b>6.4</b>                                                 | <b>6.3E-11</b>  |
| <b>mmu-miR-381</b>    | 5.4                                      | 1.1E-26 | <b>6.5</b>                                                 | <b>6.5E-65</b>  |
| <b>mmu-miR-434-5p</b> | 5.3                                      | 1.3E-29 | <b>7.7</b>                                                 | <b>4.9E-90</b>  |
| <b>mmu-miR-543</b>    | 5.2                                      | 6.7E-13 | <b>10.0</b>                                                | <b>1.1E-25</b>  |
| <b>mmu-miR-376a</b>   | 5.2                                      | 1.3E-17 | <b>5.9</b>                                                 | <b>1.3E-35</b>  |
| <b>mmu-miR-376b</b>   | 5.2                                      | 2.9E-21 | <b>6.5</b>                                                 | <b>1.7E-50</b>  |
| <b>mmu-miR-134</b>    | 5.2                                      | 3.4E-32 | <b>6.0</b>                                                 | <b>5.1E-77</b>  |
| <b>mmu-miR-495</b>    | 5.1                                      | 1.2E-11 | <b>5.1</b>                                                 | <b>1.0E-17</b>  |
| <b>mmu-miR-409-3p</b> | 5.0                                      | 1.4E-26 | <b>6.4</b>                                                 | <b>1.3E-71</b>  |

**Table S3: pathological and molecular characteristics of the pediatric cohort 1**

| Patient | Samples | Gender | Age (months) | TV       | VI | S/MN | M | SC | CH | P   | CHIC-HS | Risk | AFP (ng/mL)   | β-catenin RNaseq        |
|---------|---------|--------|--------------|----------|----|------|---|----|----|-----|---------|------|---------------|-------------------------|
| P02     | T/NT    | F      | 11           | 60       | N  | S    | N | N  | Y  | II  | B       | SR   | 153840        | exon3 del               |
| P04_a   | T/NT    | F      | 14           | 197      | N  | S    | N | N  | N  | II  | B       | SR   | 300           | exon3 del               |
| P04_c   | T/NT    | F      | 14           | 197      | N  | S    | N | N  | Y  | II  | B       | SR   | 300           | exon3 del               |
| P09     | T       | F      | 6            | 160      | N  | S    | N | N  | Y  | III | B       | NA   | 401807        | exon3 del               |
| P15     | T/NT    | M      | 5            | 760      | N  | S    | N | N  | Y  | II  | B       | SR   | 56613         | exon3 del               |
| P16     | T/NT    | M      | 36           | 800; 500 | Y  | M    | N | N  | Y  | IV  | D       | HR   | 54982         | WT                      |
| P17     | T/NT    | M      | 12           | 520      | N  | S    | N | Y  | Y  | II  | B       | SR   | 837000        | exon3 del               |
| P19     | T/NT    | M      | 9            | 2        | N  | S    | N | Y  | Y  | I   | B       | HR   | 88000         | in frame deletion aa15- |
| P20     | T/NT    | F      | 12           | 41       | N  | S    | N | N  | Y  | II  | B       | SR   | 318800        | D32V                    |
| P22     | NT      | F      | NA           | 2        | Y  | M    | Y | Y  | Y  | III | D       | HR   | 2000000       | G34V                    |
| P23     | T/NT    | M      | 50           | 4        | Y  | M    | Y | Y  | Y  | II  | D       | HR   | 350000        | in frame deletion aa25- |
| P24     | T/NT    | M      | 4            | 5        | N  | M    | N | Y  | Y  | III | C       | SR   | 82000         | S37A                    |
| P26_b   | T/NT    | M      | 28           | 2 805    | Y  | M    | Y | Y  | Y  | II  | D       | HR   | 1500000       | in frame deletion aa37- |
| P27     | T/NT    | F      | NA           | 598      | N  | S    | N | N  | Y  | II  | B       | SR   | 2355000       | G34V                    |
| P28     | T/NT    | F      | 11           | 1 540    | Y  | M    | N | Y  | Y  | IV  | C       | HR   | 360000        | exon3 del               |
| P29     | T/NT    | F      | NA           | NA       | N  | S    | N | N  | N  | II  | A       | NA   | 300           | in frame deletion aa19- |
| P32     | T/NT    | F      | 4            | 1        | N  | S    | N | N  | Y  | II  | B       | SR   | 934371        | WT                      |
| P33     | T/NT    | M      | 10           | 241      | N  | M    | N | Y  | Y  | III | C       | SR   | 300000-500000 | in frame deletion aa28- |
| P34     | T       | M      | 4            | 520      | N  | S    | N | N  | Y  | III | B       | SR   | 518000        | T41A                    |
| P35     | T/NT    | F      | 24           | 912      | Y  | M    | N | Y  | Y  | II  | C       | HR   | 1000000       | G34E                    |
| P36     | T/NT    | M      | 130          | NA       | N  | S    | N | N  | Y  | IV  | D       | HR   | NA            | WT                      |
| P38     | T/NT    | M      | 11           | 1 584    | N  | S    | N | N  | Y  | II  | B       | NA   | 155385        | exon3 del               |

CH: chemotherapy

HR: high risk

NA: non available

M: metastasis

P: PRETEXT stage

Children's Hepatic Tumors International Collaboration-Hepatoblastoma Stratification

SC: Small Cells presence

S/MN: solitary/multiple nodules

SR: standard risk

TV: Tumor volume (cm<sup>3</sup>)

VI: vascular invasion

**Table S4: Clinical, pathological and molecular characteristics of the pediatric cohort 2 (n=110) from previously published series <sup>1</sup>**

| <b>Variable</b>                |                           | <b>Total (%)</b>    |
|--------------------------------|---------------------------|---------------------|
| <b>Age (months)</b>            | [median. min-max]         | 33 (3-278)          |
| <b>Gender</b>                  | Male : Female             | 65 (59%) : 45 (41%) |
| <b>Sample Type</b>             | Primary hepatoblastoma    | 83 (75%)            |
|                                | Hepatoblastoma relapse    | 3 (3%)              |
|                                | Hepatoblastoma metastasis | 14 (13%)            |
|                                | Hepatocellular carcinoma  | 10 (9%)             |
| <b>Etiology</b>                | Without known etiology    | 94 (85%)            |
|                                | Other*                    | 16 (15%)            |
| <b>Chemotherapy</b>            | yes                       | 84 (76%)            |
|                                | no                        | 26 (24%)            |
| <b>Transcriptomic group</b>    | Hepatocyte 1              | 21 (25%)            |
|                                | Hepatocyte 2              | 19 (23%)            |
|                                | Liver Progenitor          | 33 (40%)            |
|                                | Mesenchymal               | 10 (12%)            |
| <b><i>CTNNB1</i> mutations</b> | Mutated                   | 92 (92%)            |
|                                | Non-mutated               | 8 (8%)              |

\*Beckwith Wiedmann Syndrome; Familial Adenomatous Polyposis; Mitochondrial Cytopathy. Progressive familial intrahepatic cholestasis. Tyrosinemia. Simpson Golabi Behmel Syndrome.

**Table S5: Top 20 under-expressed RNAs in  $Apc^{\Delta hep-DLK1/DIO3^{\Delta WRE}}$  versus  $Apc^{\Delta hep-Rosa26}$  hepatocytes from RNAseq data.** Results are represented as the log2 fold induction in  $Apc^{\Delta hep-DLK1/DIO3^{\Delta WRE}}$  versus  $Apc^{\Delta hep-Rosa26}$  hepatocytes and their respective adjusted p-value (padj). RNAs produced from the *Dlk1/Dio3* locus are indicated in bold and grey.

| gene                 | Log2 $Apc^{\Delta hep-DLK1/DIO3^{\Delta WRE}} / Apc^{\Delta hep-Rosa26}$ | p-adj          |
|----------------------|--------------------------------------------------------------------------|----------------|
| Oxtr                 | -5.12                                                                    | 2.0E-03        |
| <b>Gm37899</b>       | <b>-2.81</b>                                                             | <b>9.0E-03</b> |
| Gm27000              | -2.81                                                                    | 2.0E-03        |
| <b>B830012L14Rik</b> | <b>-2.65</b>                                                             | <b>1.0E-02</b> |
| Hba-a1               | -2.63                                                                    | 4.0E-02        |
| Drp2                 | -2.61                                                                    | 1.0E-02        |
| <b>Mirg</b>          | <b>-2.49</b>                                                             | <b>3.5E-08</b> |
| <b>Rtl1</b>          | <b>-2.47</b>                                                             | <b>4.5E-07</b> |
| <b>Rian</b>          | <b>-2.29</b>                                                             | <b>2.4E-16</b> |
| Gm12248              | -2.05                                                                    | 2.0E-02        |
| <b>Meg3</b>          | <b>-2.03</b>                                                             | <b>6.0E-03</b> |
| Depdc1a              | -1.9                                                                     | 4.0E-03        |
| Col6a3               | -1.75                                                                    | 5.0E-03        |
| Gm48302              | -1.75                                                                    | 3.0E-02        |
| Cenpf                | -1.7                                                                     | 3.0E-02        |
| Cip2a                | -1.69                                                                    | 3.0E-05        |
| Melk                 | -1.69                                                                    | 8.0E-03        |
| Nuf2                 | -1.61                                                                    | 2.0E-03        |
| Kif20b               | -1.61                                                                    | 3.0E-03        |
| Pla2r1               | -1.58                                                                    | 2.0E-04        |

**Table S6: Top 20 under-expressed miRNAs in *Apc*<sup>Δhep</sup>-*DLK1/DIO3*<sup>ΔWRE</sup> versus *Apc*<sup>Δhep</sup>-*Rosa26* hepatocytes from small RNAseq data.** Results are represented as the log2 fold induction in *Apc*<sup>Δhep</sup>-*DLK1/DIO3*<sup>ΔWRE</sup> versus *Apc*<sup>Δhep</sup>-*Rosa26* hepatocytes and their respective adjusted p-value (padj). miRNAs produced from the *Dlk1/Dio3* locus are indicated in bold.

| miRNA                  | Log2 <i>Apc</i> <sup>Δhep</sup> <i>DLK1/DIO3</i> <sup>ΔWRE</sup> / <i>Apc</i> <sup>Δhep</sup> <i>Rosa26</i> | p-adj          |
|------------------------|-------------------------------------------------------------------------------------------------------------|----------------|
| <b>mmu-miR-337-5p</b>  | <b>0.47</b>                                                                                                 | <b>2.3E-05</b> |
| <b>mmu-miR-127-3p</b>  | <b>0.47</b>                                                                                                 | <b>2.9E-05</b> |
| <b>mmu-miR-154-5p</b>  | <b>0.47</b>                                                                                                 | <b>1.4E-04</b> |
| <b>mmu-miR-299a-3p</b> | <b>0.48</b>                                                                                                 | <b>8.4E-04</b> |
| <b>mmu-miR-543-3p</b>  | <b>0.48</b>                                                                                                 | <b>1.1E-03</b> |
| <b>mmu-miR-134-5p</b>  | <b>0.51</b>                                                                                                 | <b>9.1E-05</b> |
| <b>mmu-miR-496a-3p</b> | <b>0.52</b>                                                                                                 | <b>6.1E-03</b> |
| <b>mmu-miR-154-3p</b>  | <b>0.52</b>                                                                                                 | <b>8.6E-03</b> |
| <b>mmu-miR-409-3p</b>  | <b>0.53</b>                                                                                                 | <b>2.6E-04</b> |
| <b>mmu-miR-434-5p</b>  | <b>0.54</b>                                                                                                 | <b>2.7E-03</b> |
| <b>mmu-miR-379-3p</b>  | <b>0.54</b>                                                                                                 | <b>4.5E-03</b> |
| <b>mmu-miR-376b-3p</b> | <b>0.54</b>                                                                                                 | <b>6.2E-03</b> |
| <b>mmu-miR-434-3p</b>  | <b>0.56</b>                                                                                                 | <b>5.8E-04</b> |
| <b>mmu-miR-1193-3p</b> | <b>0.56</b>                                                                                                 | <b>5.0E-03</b> |
| <b>mmu-miR-494-3p</b>  | <b>0.57</b>                                                                                                 | <b>3.7E-03</b> |
| <b>mmu-miR-299b-3p</b> | <b>0.57</b>                                                                                                 | <b>1.4E-02</b> |
| <b>mmu-miR-376a-3p</b> | <b>0.57</b>                                                                                                 | <b>1.7E-02</b> |
| <b>mmu-miR-136-5p</b>  | <b>0.57</b>                                                                                                 | <b>2.5E-02</b> |
| <b>mmu-miR-337-3p</b>  | <b>0.57</b>                                                                                                 | <b>3.5E-02</b> |
| <b>mmu-miR-376a-5p</b> | <b>0.57</b>                                                                                                 | <b>3.6E-02</b> |

**Table S7: Most significantly under-expressed RNAs in *Apc*<sup>Δhep</sup>-DLK1/DIO3<sup>ΔWRE</sup> versus *Apc*<sup>Δhep</sup>-Rosa26 hepatocytes from RNAseq data.** Results are represented as the log2 fold induction in *Apc*<sup>Δhep</sup>-DLK1/DIO3<sup>ΔWRE</sup> versus *Apc*<sup>Δhep</sup>-Rosa26 hepatocytes and their respective adjusted p-value (padj). RNAs produced from the *Dlk1/Dio3* locus are indicated in bold and grey and those involved in cell cycle process in red.

| gene                 | Log2 <i>Apc</i> <sup>Δhep</sup> DLK1/DIO3 <sup>ΔWRE</sup> / <i>Apc</i> <sup>Δhep</sup> Rosa26 | p-adj          |
|----------------------|-----------------------------------------------------------------------------------------------|----------------|
| <b>Rian</b>          | <b>-2.29</b>                                                                                  | <b>2.4E-16</b> |
| <b>Mirg</b>          | <b>-2.49</b>                                                                                  | <b>3.5E-08</b> |
| <b>Rtl1</b>          | <b>-2.47</b>                                                                                  | <b>4.5E-07</b> |
| <b>Kif20a</b>        | <b>-1.36</b>                                                                                  | <b>3.0E-06</b> |
| <b>Cip2a</b>         | <b>-1.69</b>                                                                                  | <b>3.0E-05</b> |
| Pla2r1               | -1.58                                                                                         | 2.0E-04        |
| Ifi213               | -1.12                                                                                         | 2.0E-03        |
| Gm27000              | -2.81                                                                                         | 2.0E-03        |
| <b>Nuf2</b>          | <b>-1.61</b>                                                                                  | <b>2.0E-03</b> |
| <b>Ccnb1</b>         | <b>-1.22</b>                                                                                  | <b>2.0E-03</b> |
| <b>Ckap2</b>         | <b>-1.52</b>                                                                                  | <b>2.0E-03</b> |
| Oxtr                 | -5.12                                                                                         | 2.0E-03        |
| <b>Top2a</b>         | <b>-0.99</b>                                                                                  | <b>2.0E-03</b> |
| Thrsp                | -1.03                                                                                         | 2.0E-03        |
| <b>Kif4</b>          | <b>-0.99</b>                                                                                  | <b>2.0E-03</b> |
| Nedd4l               | 0.62                                                                                          | 3.0E-03        |
| <b>Kif20b</b>        | <b>-1.61</b>                                                                                  | <b>3.0E-03</b> |
| <b>Ccna2</b>         | <b>-1.04</b>                                                                                  | <b>3.0E-03</b> |
| <b>Depdc1a</b>       | <b>-1.9</b>                                                                                   | <b>4.0E-03</b> |
| <b>Hmmr</b>          | <b>-1.27</b>                                                                                  | <b>4.0E-03</b> |
| <b>Nusap1</b>        | <b>-1.22</b>                                                                                  | <b>4.0E-03</b> |
| Slc25a30             | 1.42                                                                                          | 5.0E-03        |
| Rbpms                | 0.89                                                                                          | 5.0E-03        |
| Mndal                | -0.97                                                                                         | 5.0E-03        |
| Col6a3               | -1.75                                                                                         | 5.0E-03        |
| <b>Meg3</b>          | <b>-2.03</b>                                                                                  | <b>6.0E-03</b> |
| Melk                 | -1.69                                                                                         | 8.0E-03        |
| <b>Gm37899</b>       | <b>-2.81</b>                                                                                  | <b>9.0E-03</b> |
| <b>Racgap1</b>       | <b>-0.95</b>                                                                                  | <b>1.0E-02</b> |
| Drp2                 | -2.61                                                                                         | 1.0E-02        |
| Pdilt                | -0.70                                                                                         | 1.0E-02        |
| Atp8a1               | -1.08                                                                                         | 1.0E-02        |
| Mir99ahg             | -1.55                                                                                         | 1.0E-02        |
| <b>B830012L14Rik</b> | <b>-2.65</b>                                                                                  | <b>1.0E-02</b> |
| <b>Slc34a2</b>       | <b>-1.12</b>                                                                                  | <b>2.0E-02</b> |
| Gm12248              | -2.05                                                                                         | 2.0E-02        |
| <b>Foxa2</b>         | <b>0.82</b>                                                                                   | <b>2.0E-02</b> |
| <b>Rnf144a</b>       | <b>1.27</b>                                                                                   | <b>2.0E-02</b> |
| <b>Cdca3</b>         | <b>-0.82</b>                                                                                  | <b>2.0E-02</b> |
| Mgat4b               | 0.72                                                                                          | 2.0E-02        |
| <b>Flot1</b>         | <b>0.60</b>                                                                                   | <b>2.0E-02</b> |
| Chic1                | -0.80                                                                                         | 2.0E-02        |
| Slc33a1              | -0.48                                                                                         | 2.0E-02        |
| Gm48302              | -1.75                                                                                         | 3.0E-02        |
| Insig1               | -0.75                                                                                         | 3.0E-02        |



|         |       |         |
|---------|-------|---------|
| Foxa3   | 0.45  | 3.0E-02 |
| Cenpf   | -1.7  | 3.0E-02 |
| Zxda    | 1.24  | 3.0E-02 |
| mt-Atp6 | -0.75 | 3.0E-02 |
| Cdk1    | -0.76 | 4.0E-02 |
| Hba-a1  | -2.63 | 4.0E-02 |
| Gas2l3  | -0.98 | 4.0E-02 |
| Rasa2   | 1.16  | 4.0E-02 |
| Gm32540 | 2.45  | 4.0E-02 |
| Hmga1b  | 4.97  | 4.0E-02 |
| Rab35   | 0.57  | 4.0E-02 |
| Ncapg2  | -1.23 | 5.0E-02 |

**Table S8: RNAseq data for regulators of cell cycle progression and cytokinesis.** Results are represented as the log<sub>2</sub> fold induction in *Apc*<sup>Δhep</sup> versus wild-type hepatocytes and *Apc*<sup>Δhep</sup>-DLK1/DIO3<sup>ΔWRE</sup> versus *Apc*<sup>Δhep</sup>-Rosa26 hepatocytes and their respective adjusted p-value (padj); in green: down-regulation. in orange: up-regulation.

| gene    | Log <sub>2</sub> <i>Apc</i> <sup>Δhep</sup> vs wt | pvalue | Log <sub>2</sub> <i>Apc</i> <sup>Δhep</sup> DLK1/DIO3 <sup>ΔWRE</sup> vs <i>Apc</i> <sup>Δhep</sup> | padj  |
|---------|---------------------------------------------------|--------|-----------------------------------------------------------------------------------------------------|-------|
| Kif4    | 2.7                                               | 1E-05  | -1.0                                                                                                | 2E-03 |
| Kif20a  | 2.4                                               | 1E-10  | -1.4                                                                                                | 3E-06 |
| Kif20b  | 3.9                                               | 1E-06  | -1.6                                                                                                | 2E-03 |
| Nuf2    | 3.1                                               | 4E-05  | -1.6                                                                                                | 3E-03 |
| Nusap1  | 2.8                                               | 4E-05  | -1.2                                                                                                | 4E-03 |
| Top2a   | 2.8                                               | 3E-12  | -1.0                                                                                                | 2E-03 |
| Gas2l3  | 1.4                                               | 1E-02  | -1.0                                                                                                | 4E-02 |
| Cenpf   | 2.9                                               | 8E-10  | -1.7                                                                                                | 3E-02 |
| Ckap2   | 3.1                                               | 3E-08  | -1.5                                                                                                | 2E-03 |
| Depdc1a | 2.2                                               | 1E-02  | -1.9                                                                                                | 4E-03 |
| Hmmr    | 2.1                                               | 2E-05  | -1.3                                                                                                | 4E-03 |
| Racgap1 | 2.8                                               | 1E-07  | -1.0                                                                                                | 1E-02 |
| Pla2r1  | 3.1                                               | 2E-03  | -1.6                                                                                                | 2E-04 |
| Rasa2   | 1.3                                               | 6E-02  | 1.1                                                                                                 | 4E-02 |
| Flot1   | 1.0                                               | 2E-03  | 0.6                                                                                                 | 2E-02 |
| Ccna2   | 2.3                                               | 6E-07  | -1.2                                                                                                | 2E-03 |
| Ccnb1   | 2.3                                               | 4E-03  | -1.2                                                                                                | 2E-03 |
| Cdk1    | 2.6                                               | 1E-07  | -0.7                                                                                                | 4E-02 |

**Table S9: lists of primers and probes used**

| <b>Name</b>                     | <b>Sequence</b>                                                       | <b>Supplier</b>         |
|---------------------------------|-----------------------------------------------------------------------|-------------------------|
| <i>Ctnnb1-I2-3</i>              | 5'-TCAGTATGAGCTCCATGGGAC AGGGGT-3'                                    | Eurogentec <sup>1</sup> |
| <i>Ctnnb1-I3-1</i>              | 5'-GACAGCTCAGCCACAGCACAA GTGGGT-3'                                    | Eurogentec <sup>1</sup> |
| <i>Rosa-1</i>                   | 5'-CTCGATGGAAAATACTCCGAG GCGGAT-3'                                    | Eurogentec <sup>1</sup> |
| <i>sg2 DLK1-WRE (mouse)</i>     | 5'- TTCCTCAGTGGGGCTAAAGGA GAGGGT -3'                                  | Eurogentec <sup>1</sup> |
| <i>Sg5 DLK1-WRE (mouse)</i>     | 5'- GGATGACCTTTGACTTCTGAA GGGAGT -3'                                  | Eurogentec <sup>1</sup> |
| <i>Sg1 DLK1-WRE (human)</i>     | 5'- TATTCAGAGCAAGCCTGTGGC ATGAAT -3'                                  | Eurogentec <sup>1</sup> |
| <i>Sg2 DLK1-WRE (human)</i>     | 5'- TACCCTTAGGTGTTGCGGA AAGGAT -3'                                    | Eurogentec <sup>1</sup> |
| <i>Sg3 DLK1-WRE (human)</i>     | 5'- GCAGGACCCTTCTCAAAGGGC CAGGGT -3'                                  | Eurogentec <sup>1</sup> |
| <i>Sg3 DLK1-WRE (human)</i>     | 5'- CTTTGCAGTCGTGAAGTGTGG GGGGAT -3'                                  | Eurogentec <sup>1</sup> |
| <i>Rosa26 editing</i>           | F 5'-CTTGCTCTCCCAAAGTCGCT-3'<br>R 5'-CCAATGCTCTGTCTAGGGGT-3'          | Eurogentec <sup>1</sup> |
| <i>Ctnnb1 editing</i>           | F 5'-TTTTGGTGTGCGGGCACATA-3'<br>R 5'-CATGGTGCGTACAATGGCAG-3'          | Eurogentec <sup>1</sup> |
| <i>DLK1-WRE editing (mouse)</i> | F 5'-AGCATGGCCGAGTACTCATT-3'<br>R 5'-CCTCTGCATGACCTGTGACT-3'          | Eurogentec <sup>1</sup> |
| <i>DLK1-WRE editing (human)</i> | F 5'-TGAGGCTGCAATGAACCATG-3'<br>R 5'-GGCTTATGTTGTGCAAACGC-3'          | Eurogentec <sup>1</sup> |
| 18S                             | F 5'-GTAACCCGTTGAACCCCAT-3'<br>R 5'-CCATCCAATCGGTAGTAGCG -3'          | Eurogentec <sup>1</sup> |
| <i>Mirg</i>                     | F 5'-A GCCATCTACCTCTGAGTCCC-3'<br>R 5'-AGAGCAGAAACCCCTCCTTC-3'        | Eurogentec <sup>1</sup> |
| <i>Rian</i>                     | F 5'-CCAGGTTCAAGGTCCTCAT-3'<br>R 5'-TCTTGTGTCTCGAAGGCCTT-3'           | Eurogentec <sup>1</sup> |
| <i>Mki67</i>                    | F 5'-CTGCCTGCGAAGAGAGCATC-3'<br>R 5'-AGCTCCACTTCGCCTTTTGG-3'          | Eurogentec <sup>1</sup> |
| <i>Kif20a</i>                   | F 5'-AAGTGGTGAGCGGCTAAAGGAG-3'<br>R 5'-GAAGCCTTGAACACACGAGTC-3'       | Eurogentec <sup>1</sup> |
| <i>Kif20b</i>                   | F 5'-GGATGACCTAGACGTGCTTACC-3'<br>R 5'-TCGCTTGTGAGTGGTAAGGACAGC-3'    | Eurogentec <sup>1</sup> |
| <i>Nuf2</i>                     | F 5'-CCTCTATGGTCAGAATGCAGCAG-3'<br>R 5'-ACTGCTTGAACCTCTCGCTC-3'       | Eurogentec <sup>1</sup> |
| <i>Nusap1</i>                   | F 5'-TTCCTCCAAGAGGAAGGCTCTC-3'<br>R 5'-GGTGTCTTGGTCAGTGAGCACT-3'      | Eurogentec <sup>1</sup> |
| <i>Top2a</i>                    | F 5'-CAAGCGAGAAGTGAAGGTTGCC-3'<br>R 5'-GCTACCCACAAAATTCTGCGCC-3'      | Eurogentec <sup>1</sup> |
| <i>Cenpf</i>                    | F 5'- GCACGACTTCAGTTACAGGAGC -3'<br>R 5'- TGCTTGGTGTTTTCTCTGTAGTC -3' | Eurogentec <sup>1</sup> |
| <i>Ckap2</i>                    | F 5'- TACTGACCAGCGCAGATACACG -3'<br>R 5'- TCCTTGGCCAGTTCCTCCACTCC-3'  | Eurogentec <sup>1</sup> |
| <i>Ccna2</i>                    | F 5'- GCCTTACCATTTCATGTGGAT -3'<br>R 5'- TTGCTCCGGGTAAAGAGACAG-3'     | Eurogentec <sup>1</sup> |
| <i>Fadd</i>                     | F 5'-CACACAATGTCAAATGCCACCTG-3'<br>R 5'-TGCGCCGACACGATCTACTGC-3'      | Eurogentec <sup>1</sup> |
| <i>Ccl2</i>                     | F 5'-TCTGGGCCTGCTGTTTACA-3'<br>R 5'-GGATCATCTTGTGGTGAATGA-3'          | Eurogentec <sup>1</sup> |
| <i>Ccl5</i>                     | F 5'-GCTGCTTTGCCTACCTCTCC-3'<br>R 5'-TCGAGTGACAAACACGACTGC-3'         | Eurogentec <sup>1</sup> |
| <i>Csf1</i>                     | F 5'-TACAAGTGAAGTGGAGGAGCCAT-3'<br>R 5'-AGTCCTGTGTGCCCAGCATAGAAT-3'   | Eurogentec <sup>1</sup> |
| <i>Human FADD</i>               | F 5'-ATTAATGCCTCTCCCGCACC-3'<br>R 5'-TCTCTGCTTCGCTCCGATTC-3'          | Eurogentec <sup>1</sup> |
| <i>DLK1-WRE (ChIP)</i>          | F 5'-CCTCTTCTGCCCCTAACGTA-3'<br>R 5'-CCTGTGCTGGATGACCTTTGA -3'        | Eurogentec <sup>1</sup> |
| <i>Myc-10kb (ChIP control)</i>  | F 5'- ACACACCTTGAATCCCGT -3'                                          | Eurogentec <sup>1</sup> |

|                                       |                                                                              |                                    |
|---------------------------------------|------------------------------------------------------------------------------|------------------------------------|
|                                       | R 5'- CCCAGCTAGAATGAACAAG -3'                                                |                                    |
| <i>Kif20a</i> (ChIP)                  | F 5'- GGT-AAC-CCG-GAC-CCA-CAT-TA -3'<br>R 5'- TGA-TCC-CAG-CTT-CTA-CCC-AC -3' | Eurogentec <sup>1</sup>            |
| <i>Ccna2</i> (ChIP)                   | F 5'- CTT-TCT-CTG-TGA-TGC-TGC-CA -3'<br>R 5'- GGG-GTG-GGG-TAG-TTT-ACT-GG -3' | Eurogentec <sup>1</sup>            |
| <i>Cdc2</i> (ChIP)                    | F 5'- CGA-GTG-CCA-GCA-GTT-TCA-AA -3'<br>R 5'- GAG-CTC-AAG-AGT-CAG-TTG-GC -3' | Eurogentec <sup>1</sup>            |
| <i>Cenpf</i> (ChIP)                   | F 5'- ACGAGCGATTCAAACCTGCC -3'<br>R 5'- CCAAAGGGCCAATCAGAGG -3'              | Eurogentec <sup>1</sup>            |
| <i>Ig-DMR</i> (ChIP)                  | F 5'-GACACCCTGCCTTCTCTCTT-3'<br>R 5'-TTCCCTACTGCCCTTCCTTG-3'                 | Eurogentec <sup>1</sup>            |
| <i>human CCNA2</i> (ChIP)             | F 5'-AGTTCAAGTATCCCGCGACT-3'<br>R 5'-CCCAGCCAGTTTGTCTTCC-3'                  | Eurogentec <sup>1</sup>            |
| <i>human KIF20A</i> (ChIP)            | F 5'-GGTAACCCGGACCCACATTA-3'<br>R 5'-TTACTCACACCTAGTCGCCG-3'                 | Eurogentec <sup>1</sup>            |
| <i>human CDC2</i> (ChIP)              | F 5'-TGCTCCGCTGACTAGAAAC-3'<br>R 5'-GTTTCAAACCTACCCGCGCTA-3'                 | Eurogentec <sup>1</sup>            |
| <i>F1</i> (3C)                        | F 5'- TCCCTCCAAGGTAAGAGCCCG -3'<br>R 5'- AGGGACAAACTTGGCAGCAGTC -3'          | Eurogentec <sup>1</sup>            |
| <i>F14</i> (3C)                       | F 5'- CTGCATGGGCAGACAAGGACC -3'<br>R 5'- CAGGCAGCCACTACTACAGAAG -3'          | Eurogentec <sup>1</sup>            |
| <i>F33</i> (3C)                       | F 5'- GCTCAACGAAGAGATCAGGCAC -3'<br>R 5'- GCATCCATCCAGGCTACGCTTC -3'         | Eurogentec <sup>1</sup>            |
| <i>F16</i> (DLK1-WRE. 3C)             | 5'- CTCCCTCCACGGCTCAGATC-3'                                                  | Eurogentec <sup>1</sup>            |
| <i>F4</i> (3C)                        | 5'-GGCAGGTATAGCATCATACTCCC-3'                                                | Eurogentec <sup>1</sup>            |
| <i>F5</i> (3C)                        | 5'-CATGTCCCATGTGGCCACTTGC-3'                                                 | Eurogentec <sup>1</sup>            |
| <i>F10</i> (3C)                       | 5'-CTATCTCCAAGTGGTCTTGGCC-3'                                                 | Eurogentec <sup>1</sup>            |
| <i>F11</i> (3C)                       | 5'-GATGAGCGTGGCACTCAGACC-3'                                                  | Eurogentec <sup>1</sup>            |
| <i>F12</i> (3C)                       | 5'-CCACATCTGGCCAGTGCTTGC-3'                                                  | Eurogentec <sup>1</sup>            |
| <i>F17</i> (3C)                       | 5'-CTTGGTTCACCCATCCTTGGCC-3'                                                 | Eurogentec <sup>1</sup>            |
| <i>F20</i> (3C)                       | 5'-GCAGTAGTAGCACCTGCTGGTC-3'                                                 | Eurogentec <sup>1</sup>            |
| <i>F21</i> (3C)                       | 5'-GCTCAGAGCTGGAGAGACAGAC-3'                                                 | Eurogentec <sup>1</sup>            |
| <i>F22</i> (3C)                       | 5'-CCATGCTATTGGAGGTCCTGGG-3'                                                 | Eurogentec <sup>1</sup>            |
| <i>F23</i> (3C)                       | 5'-CCTGGGTGCCCCCAAATACAC-3'                                                  | Eurogentec <sup>1</sup>            |
| <i>F24</i> (3C)                       | 5'-GTGGGCCATTTCTGCAGGGTG-3'                                                  | Eurogentec <sup>1</sup>            |
| <i>F31</i> (3C)                       | 5'-CAGCACTCGGTTCTGCTACCAG-3'                                                 | Eurogentec <sup>1</sup>            |
| <i>F32</i> (3C)                       | 5'-GACCAAGGGTTTCATGGGGCAG-3'                                                 | Eurogentec <sup>1</sup>            |
| <i>F34</i> (3C)                       | 5'-CTGCTGCAAGGTTTGGAGGATG-3'                                                 | Eurogentec <sup>1</sup>            |
| <i>Meg3</i> (in situ hybridization)   | Sens: 5'AAGAAGACTGAGGACCCCAGGA-3'<br>Antisens 5'-TGTGTCCGTGTGTCCAGGGT-3'     | Eurogentec <sup>1</sup>            |
| miR-127 probe (in situ hybridization) | MIMAT0004604                                                                 | Exiqon/ Thermo Fisher <sup>2</sup> |
| Hsa-miR-127                           | 000452                                                                       | Thermo Fisher <sup>2</sup>         |
| sno135                                | 001230                                                                       | Thermo Fisher <sup>2</sup>         |
| <i>Meg3</i> mouse                     | Mm00522599                                                                   | Thermo Fisher <sup>2</sup>         |
| <i>MEG3</i> human                     | Hs00292028                                                                   | Thermo Fisher <sup>2</sup>         |
| <i>Glul</i> mouse                     | Mm00725701                                                                   | Thermo Fisher <sup>2</sup>         |
| <i>GLUL</i> human                     | Hs00365928 g1                                                                | Thermo Fisher <sup>2</sup>         |
| <i>Apc</i> total form                 | Mm00545877                                                                   | Thermo Fisher <sup>2</sup>         |
| <i>Apc</i> deleted form               | Mm01130462                                                                   | Thermo Fisher <sup>2</sup>         |
| human RIAN (MEG8)                     | Hs00419701 m1                                                                | Thermo Fisher <sup>2</sup>         |
| human MIRG (MEG9)                     | Hs01593046 s1                                                                | Thermo Fisher <sup>2</sup>         |
| mouse Rian                            | Mm01325842 g1                                                                | Thermo Fisher <sup>2</sup>         |
| mouse Mirg                            | Mm01335848                                                                   | Thermo Fisher <sup>2</sup>         |
| human RTL-1                           | Hs06637009 s1                                                                | Thermo Fisher <sup>2</sup>         |
| mouse Rtl-1                           | Mm02392620 s1                                                                | Thermo Fisher <sup>2</sup>         |
| <i>DLK1-WRE</i> (ChIP)                | ART2AUJ                                                                      | Thermo Fisher <sup>2</sup>         |
| <i>Afp-220kb</i> (ChIP control)       | AJHSN1G                                                                      | Thermo Fisher <sup>2</sup>         |

<sup>1</sup> Eurogentec, Seraing, Belgium, <sup>2</sup>Thermofischer, Waltham, MA

**Table S10: lists of antibodies and kits used**

WB: western-blot. IHC: Immunohistochemistry

| <b>Name</b>                     | <b>Supplier</b>                      | <b>Reference</b> | <b>Quantity/Dilution</b>     |
|---------------------------------|--------------------------------------|------------------|------------------------------|
| <b>Glutamine synthétase</b>     | BD Biosciences, Franklin Lakes, NJ   | 610518           | 1/400 (IHC)                  |
| <b>Ki67</b>                     | Abcam, Cambridge, UK                 | Ab16667          | 1/300 (IHC)                  |
| <b>Cleaved Caspase 3</b>        | Cell Signaling, Danvers, MA          | #9661            | 1/600 (IHC)                  |
| <b>DLK1</b>                     | Proteintech, San Diego, CA           | 10636-1-AP       | 1/1000 (WB)                  |
| <b>Cyclin A2</b>                | Abcam, Cambridge, UK                 | ab 32386         | 1/100 (WB)                   |
| <b>Cyclin B1</b>                | Cell Signaling, Danvers, MA          | 4138             | 1/200 (WB)                   |
| <b>FOXM1</b>                    | Santa Cruz Biotechnology, Dallas, TX | sc-376471 X      | 10ug (CHIP) ,<br>1/100 (IHC) |
| <b>CD45 -PE</b>                 | BD Biosciences, Franklin Lakes, NJ   | 553081           | 1/400 (flow cytometry)       |
| <b>CD31 – BV605</b>             | BioLegend, San Diego, CA             | 102427           | 1/300 (flow cytometry)       |
| <b>CD11b – BV510</b>            | BD Biosciences, Franklin Lakes, NJ   | 562950           | 1/400 (flow cytometry)       |
| <b>CD11c – PE Cy.7</b>          | BD Biosciences, Franklin Lakes, NJ   | 558079           | 1/400 (flow cytometry)       |
| <b>F4/80 – Percp Cy 5.5</b>     | Thermofischer, Waltham, MA           | 130-118-466      | 1/300 (flow cytometry)       |
| <b>Ly6C – V450</b>              | BD Biosciences, Franklin Lakes, NJ   | 560594           | 1/200 (flow cytometry)       |
| <b>Ly6G – APC Cy.7</b>          | BioLegend, San Diego, CA             | 127624           | 1/200 (flow cytometry)       |
| <b>TCF-4</b>                    | Millipore, Burlington, MA            | 05-511           | 3ug (CHIP)                   |
| <b>β-catenin</b>                | BD Biosciences Franklin Lakes, NJ    | 610154           | 1/50 (IHC), 10μg (CHIP)      |
| <b>HNF-4α</b>                   | Santa-Cruz, Dallas, TX               | sc-6556x         | 10μg (CHIP)                  |
| <b>H3K27ac</b>                  | Active Motif, Carlsbad, CA           | 39133            | 10μg (CHIP)                  |
| <b>H3K4me3</b>                  | Active Motif, Carlsbad, CA           | 39159            | 5 μg (CHIP)                  |
| <b>H3K4me1</b>                  | Active Motif, Carlsbad, CA           | 39297            | 10μg (CHIP)                  |
| <b>β-actin</b>                  | Sigma-Aldrich, Saint-Louis, CA       | A5441            | 1/5000 (WB)                  |
| <b>FADD</b>                     | Elabscience, Houston, TX             | E-AB-10318       | 1/1000 (WB)                  |
| <b>mouse on mouse kit</b>       | Vector Lab, Newark, CA               | BMK2202          |                              |
| <b>Anti-rabbit biotinylated</b> | Vector Lab, Newark, CA               | BA-1000          | 1/200 (IHC)                  |
| <b>Histofine kit</b>            | Microm Microtech, Brignais, France   | F/414341F        |                              |
| <b>Anti-rabbit HRP</b>          | Cell Signaling, Danvers, MA          | 7074             | 1/2000 (WB)                  |
| <b>Anti-mouse HRP</b>           | Cell Signaling, Danvers, MA          | 7076             | 1/2000 (WB)                  |

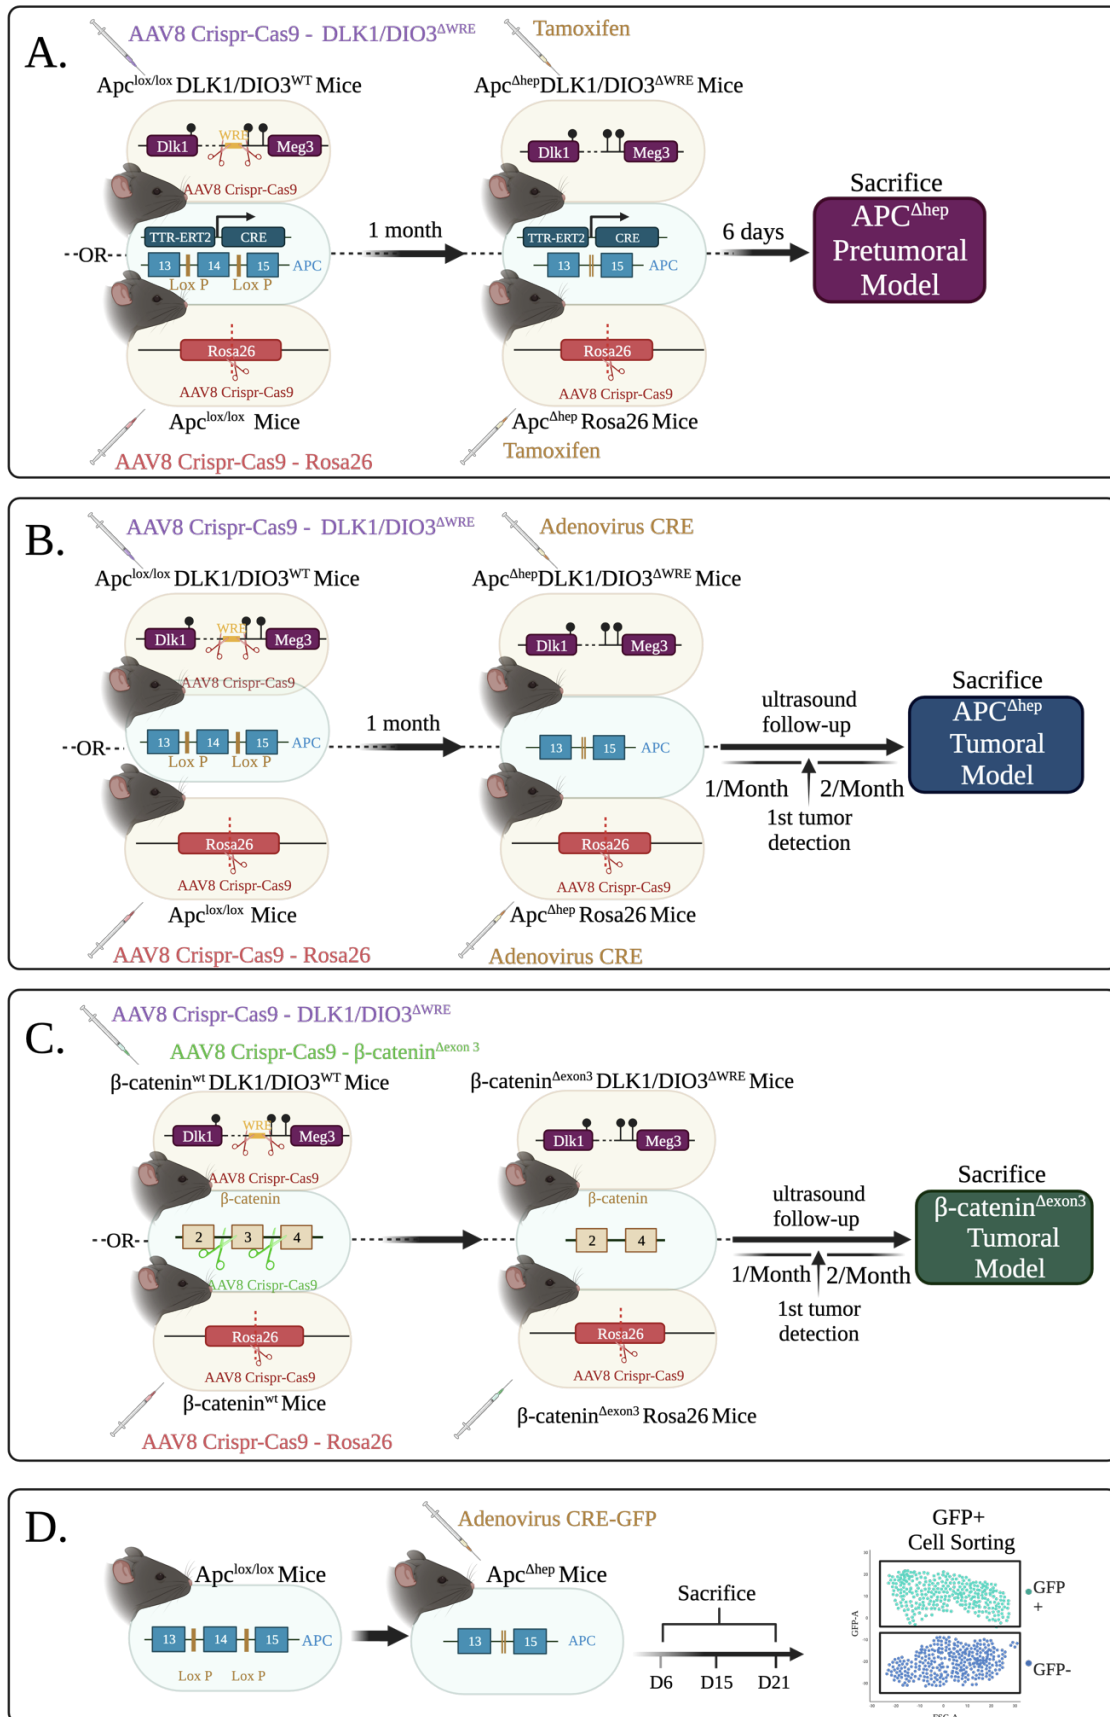

Figure S1: Schematic representation of experimental models

**A-B:** Generation of  $Apc^{\Delta hep}$ -DLK1/DIO3 $^{\Delta WRE}$  model with AAV8 CRISPR/Cas9 constructs targeting the DLK1-WRE site in  $Apc^{lox/lox}$  model: tamoxifen-induced *Apc* deletion was conducted one month after AAV8 injection, which is the time that we have identified as optimal for gene editing<sup>2</sup> in pretumoral model (**A**) and tumoral model (**B**); **C:** Generation of  $\beta$ -catenin $^{\Delta Exon3}$  DLK1/DIO3 $^{\Delta WRE}$  model with concomitant injection of AAV8 CRISPR/Cas9 constructs targeting *Ctnnb1* and the DLK1-WRE site; **D:** Kinetics of hepatocyte sorting: GFP-positive hepatocytes were sorted from tumoral  $Apc^{\Delta hep}$  livers in early-steps by flow cytometry (ARIA3, BD). GFP- and GFP+ hepatocytes from  $Apc^{wt/wt}$  mice were used as control hepatocytes. Figure made with Biorender.

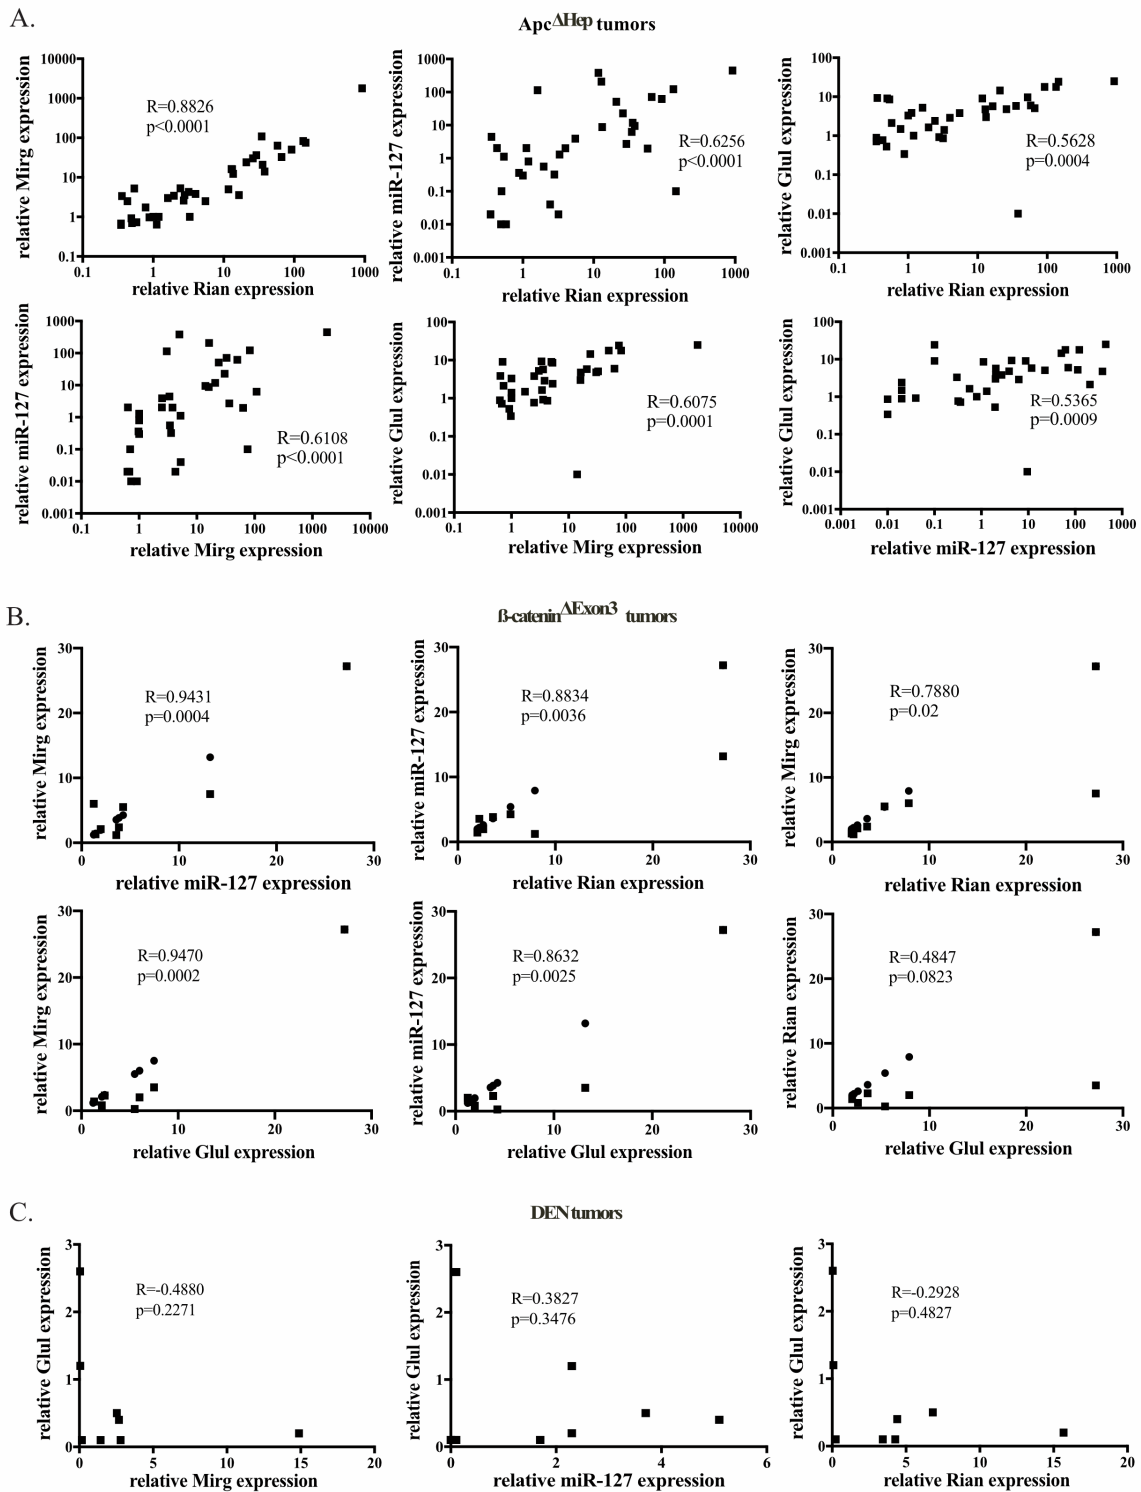

Figure S2

**Figure S2: Correlation between expression levels of RNAs within the *Dlk1/Dio3* locus and *Glul* in *Apc*<sup>Δhep</sup>,  $\beta$ -catenin<sup>ΔExon3</sup> and DEN tumors**

A-C: Correlation between *Rian*, *Mirg*, *miR-127*, and *Glul* expression levels by RT-qPCR in *Apc*<sup>Δhep</sup> tumors (A),  $\beta$ -catenin<sup>ΔExon3</sup> tumors (B), and DEN tumors (C).



A.

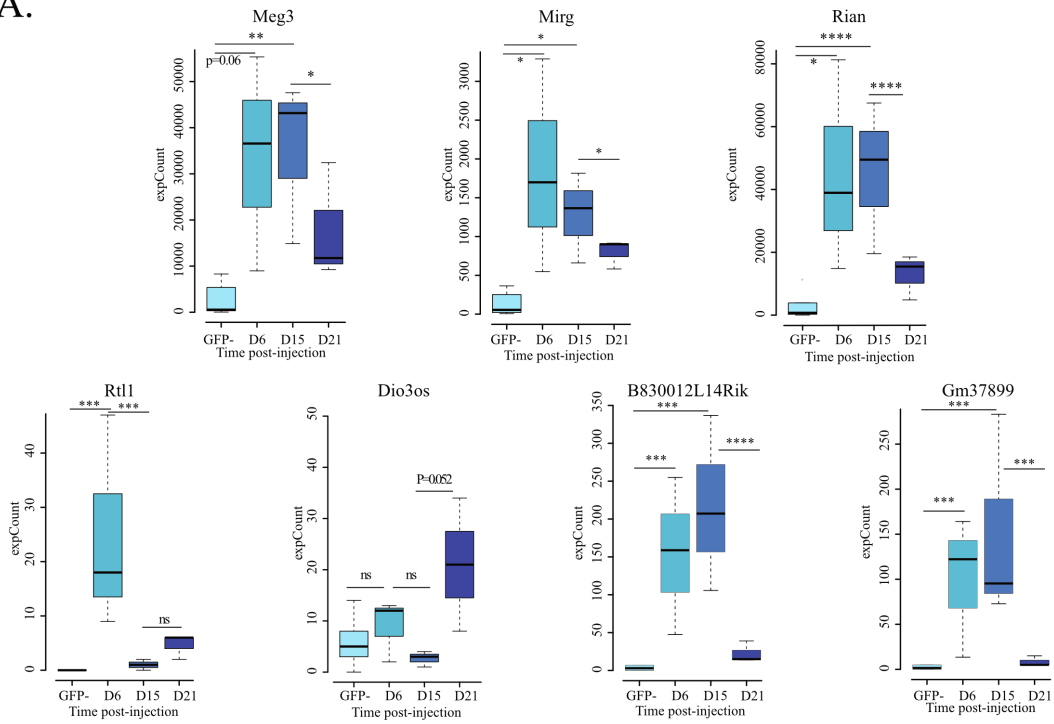

B.

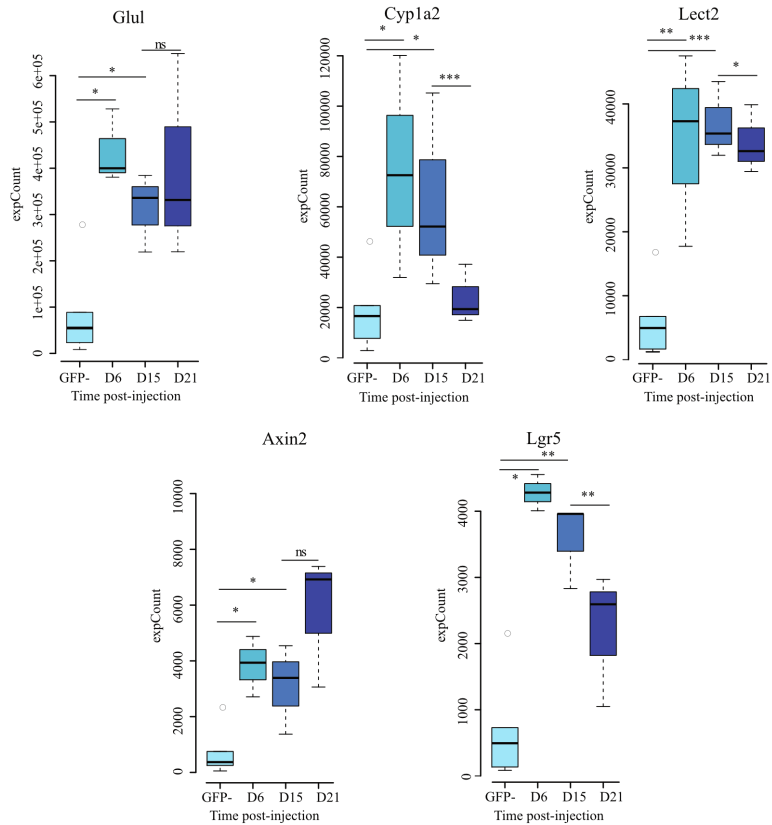

Figure S3

**Figure S3: RNAs within the *Dlk1/Dio3* locus are induced during the earliest phases of tumorigenesis in *Apc*<sup>Δhep</sup> model**

**A-B:** RNA-seq data analyses from sorted hepatocytes at day 6, 15 and day 21 after injection of an adenovirus Cre-GFP and subsequent activation of  $\beta$ -catenin signaling in  $Apc^{\Delta hep}$  model. Box plots represent the mean normalized RPKM of at least three independent samples; **A:** RNAs from the *DLK1/DIO3* locus; **B:** canonical target genes of  $\beta$ -catenin. Levels of significance: \* $p < 0.05$ , \*\*  $p < 0.01$ , \*\*\* $p < 0.005$ , \*\*\*\* $p < 0.0001$ , ns: non-significant (Mann-Whitney), with error bars representing s.e.m..

.

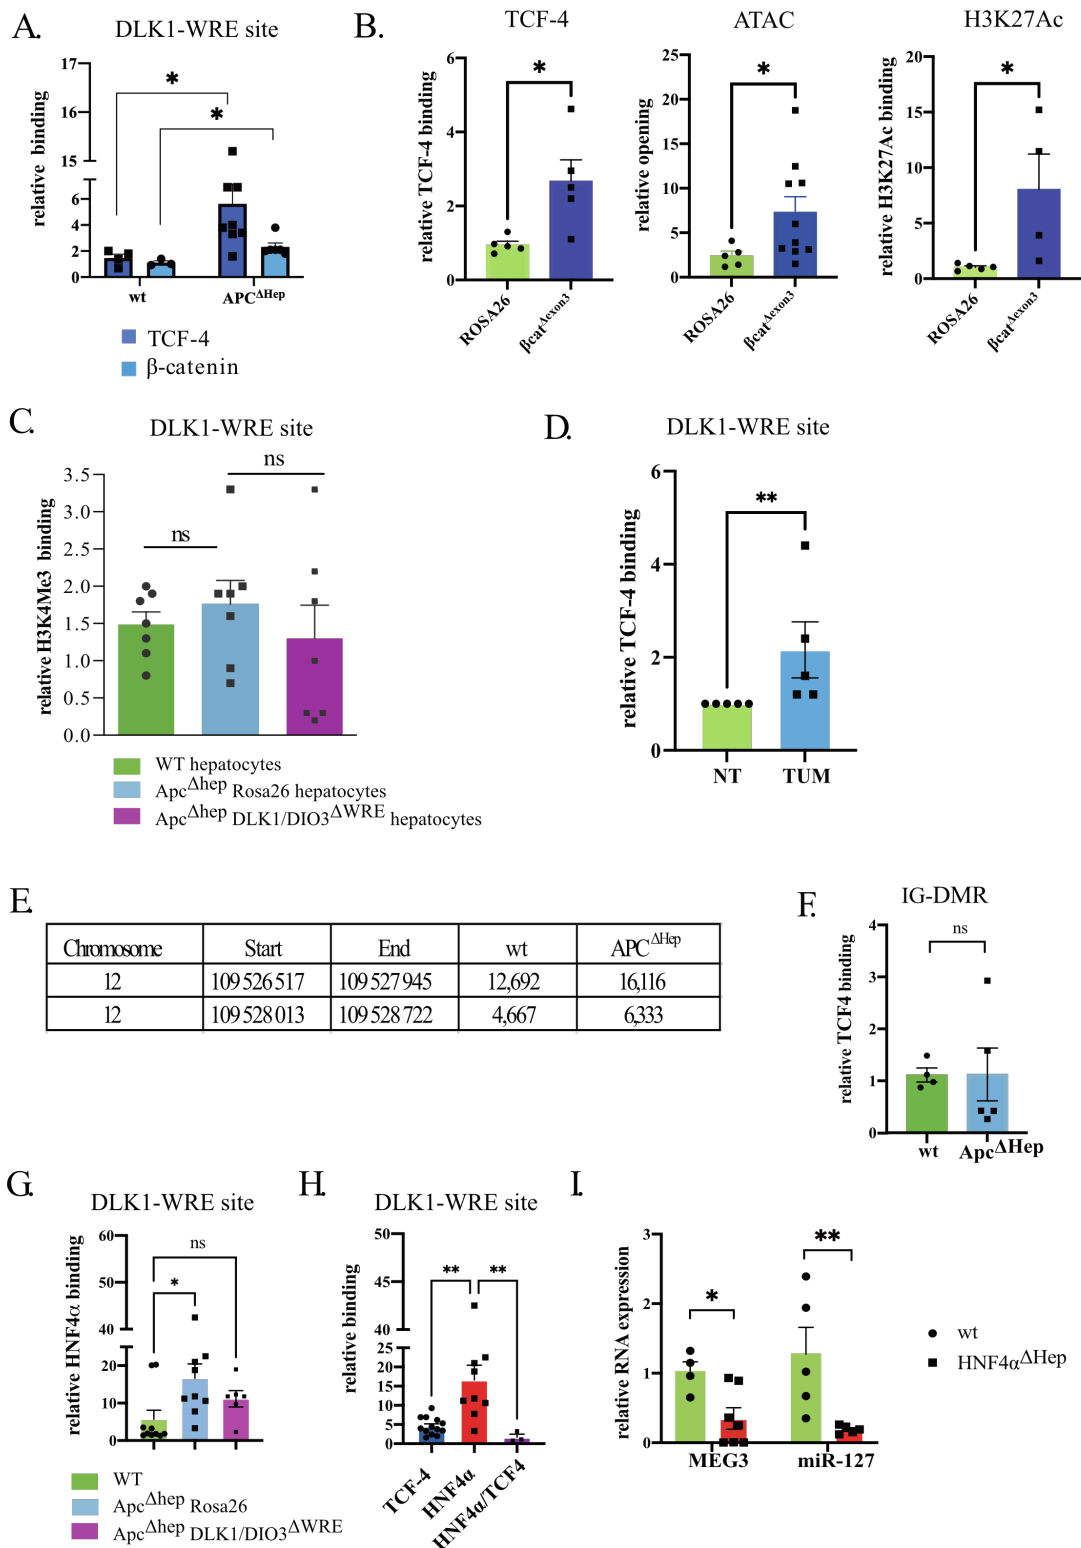

Figure S4

Figure S4: ChIP- and ATAC-qPCR validations

**A:** ChIP-qPCR analysis of  $\beta$ -catenin and TCF-4 binding at the DLK1-WRE site in wild-type (wt) and  $Apc^{\Delta hep}$  hepatocytes relative to isotype control; **B:** ChIP-qPCR analysis of TCF-4 and H3K27ac relative binding to isotype control and ATAC-qPCR performed in Rosa26 (green) and  $\beta$ -catenin $^{\Delta Exon3}$  hepatocytes (blue); **C:** ChIP-qPCR analysis of H3K4me3 marks at DLK1-WRE site in wt,  $Apc^{\Delta hep}$ -Rosa26 and  $Apc^{\Delta hep}$ -DLK1/DIO3 $^{\Delta WRE}$  hepatocytes binding to isotype control; **D:** ChIP-qPCR analysis of TCF-4 binding at the DLK1-WRE site in  $Apc^{\Delta hep}$  and  $\beta$ -catenin $^{\Delta Exon3}$  tumors (TUM) compared to isotype control and adjacent non-tumor tissues (NT); **E:** methylation status of IG-DMR obtained by MeDIP-seq (GSE239777) in  $Apc^{\Delta hep}$  versus wild-type hepatocytes; **F:** ChIP-qPCR analysis of TCF-4 binding at the IG-DMR site in  $Apc^{\Delta hep}$  versus wt hepatocytes relative to isotype control; **G:** HNF4 $\alpha$  binding at the DLK1-WRE site in wt,  $Apc^{\Delta hep}$ -Rosa26 and  $Apc^{\Delta hep}$ -DLK1/DIO3 $^{\Delta WRE}$  hepatocytes relative to isotype control; **H:** sequential ChIP-qPCR analysis for HNF4 $\alpha$  and TCF-4 at the DLK1-WRE site in  $Apc^{\Delta hep}$ -Rosa26 hepatocytes relative to isotype control; **I:** *Meg3* and miR-127 expression determined by RT-qPCR in HNF4 $\alpha^{\Delta hep}$  hepatocytes. Levels of significance: \* $p < 0.05$ , \*\*  $p < 0.01$ , ns: non-significant (Mann-Whitney or Kruskal-Wallis), with error bars representing s.e.m..

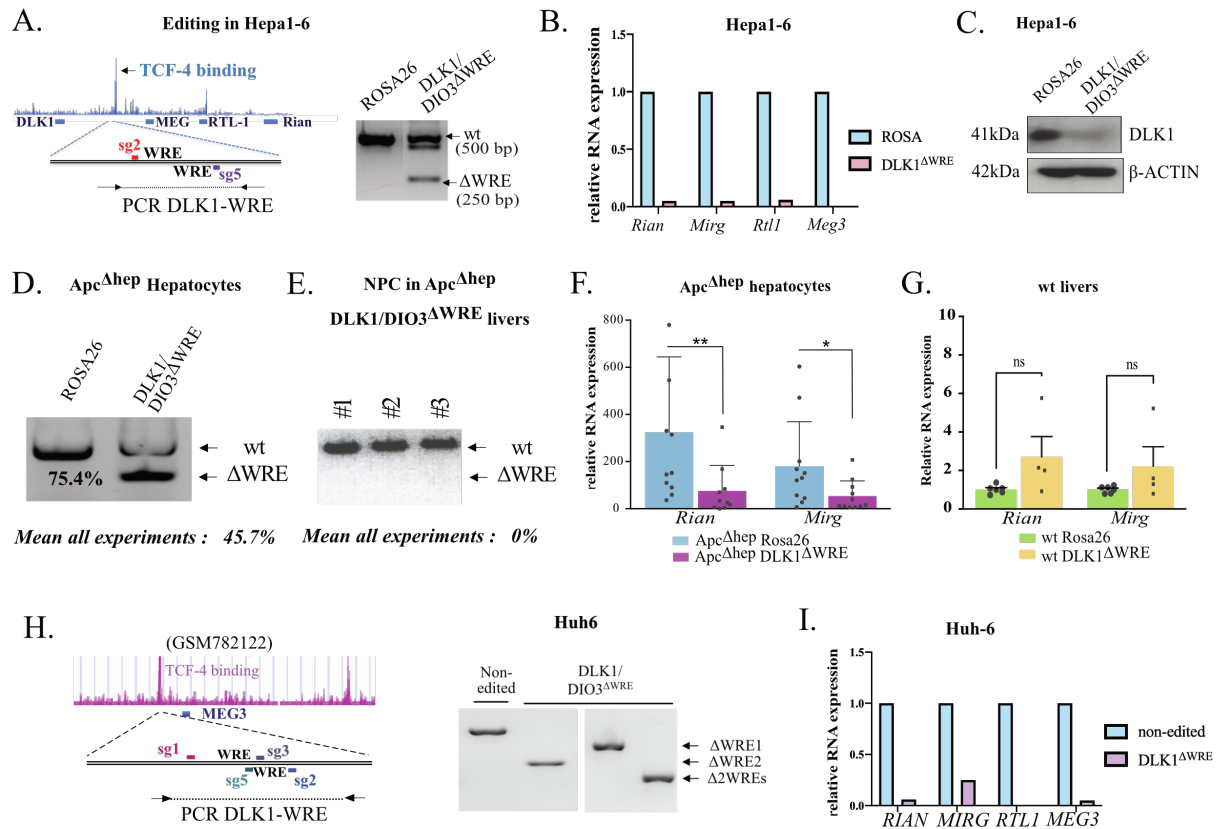

Figure S5

### Figure S5: Validation of CRISPR/Cas9 constructs in hepatic cancer cell lines and in *Apc<sup>Ahep</sup>* livers *in vivo*

**A:** Design of 2 sgRNAs to delete the TCF-4 binding site upstream of *Meg3* (left panel) and representative PCR analysis of the DLK1-WRE region showing the deleted band ( $\Delta$ WRE) and the full band (WT) (right panel) in Hepa1-6 clones; **B:** *Rian*, *Mirg*, *Meg3*, and *Rtl1* expression determined by RT-qPCR in DLK1/DIO3 <sup>$\Delta$ WRE</sup> Hepa1-6 clones compared to Rosa26 controls; **C:** DLK1 protein level determined by Western-blot in Hepa1-6 clones; **D:** Efficiency of CRISPR/Cas9 editing by AAV8 injection *in vivo* on isolated *Apc<sup>Ahep</sup>*-Rosa26 and *Apc<sup>Ahep</sup>*-DLK1/DIO3 <sup>$\Delta$ WRE</sup> hepatocytes. A representative PCR analysis of the DLK1-WRE region is shown with quantification of the deleted band with ImageJ as well as the mean of all experiments indicated below **E:** representative PCR analysis of the DLK1-WRE region showing no deleted band on three samples of non-parenchymal cells (NPCs) isolated from *Apc<sup>Ahep</sup>*-DLK1/DIO3 <sup>$\Delta$ WRE</sup> livers; **F-G:** Relative expression of *Rian* and *Mirg* by RT-qPCR in isolated *Apc<sup>Ahep</sup>*-DLK1/DIO3 <sup>$\Delta$ WRE</sup> versus *Apc<sup>Ahep</sup>*-Rosa26 hepatocytes compared to wild-type hepatocytes (**F**) and in wt-DLK1/DIO3 <sup>$\Delta$ WRE</sup> livers compared to wt-Rosa26 livers (**G**); **H:**

Design of 4 sgRNAs to delete the TCF-4 binding site upstream of *MEG3*, which contains 2 WREs identified from the publicly available ChIP-seq data targeting TCF-4 in the human hepatoblastoma HepG2 cell line (Gsm782122) (left panel); representative PCR analysis showing the deleted band ( $\Delta$ WRE) in DLK1/DIO3 <sup>$\Delta$ WRE</sup> Huh6 clones for three couples of sgRNAs deleting one or both WREs (right panel); the two PCR images show all types of clones emerging in a 96-well plate and thus originate from distinct regions of the same gel of screening; **I:** *MEG3*, *MIRG*, *RTL-1*, and *RIAN* expression by RT-qPCR in DLK1/DIO3 <sup>$\Delta$ WRE</sup> Huh6 clones compared to non-edited Huh6 control clones. Levels of significance: \*p<0.05, \*\* p<0.01, ns: non-significant (Mann-Whitney), with error bars representing s.e.m..

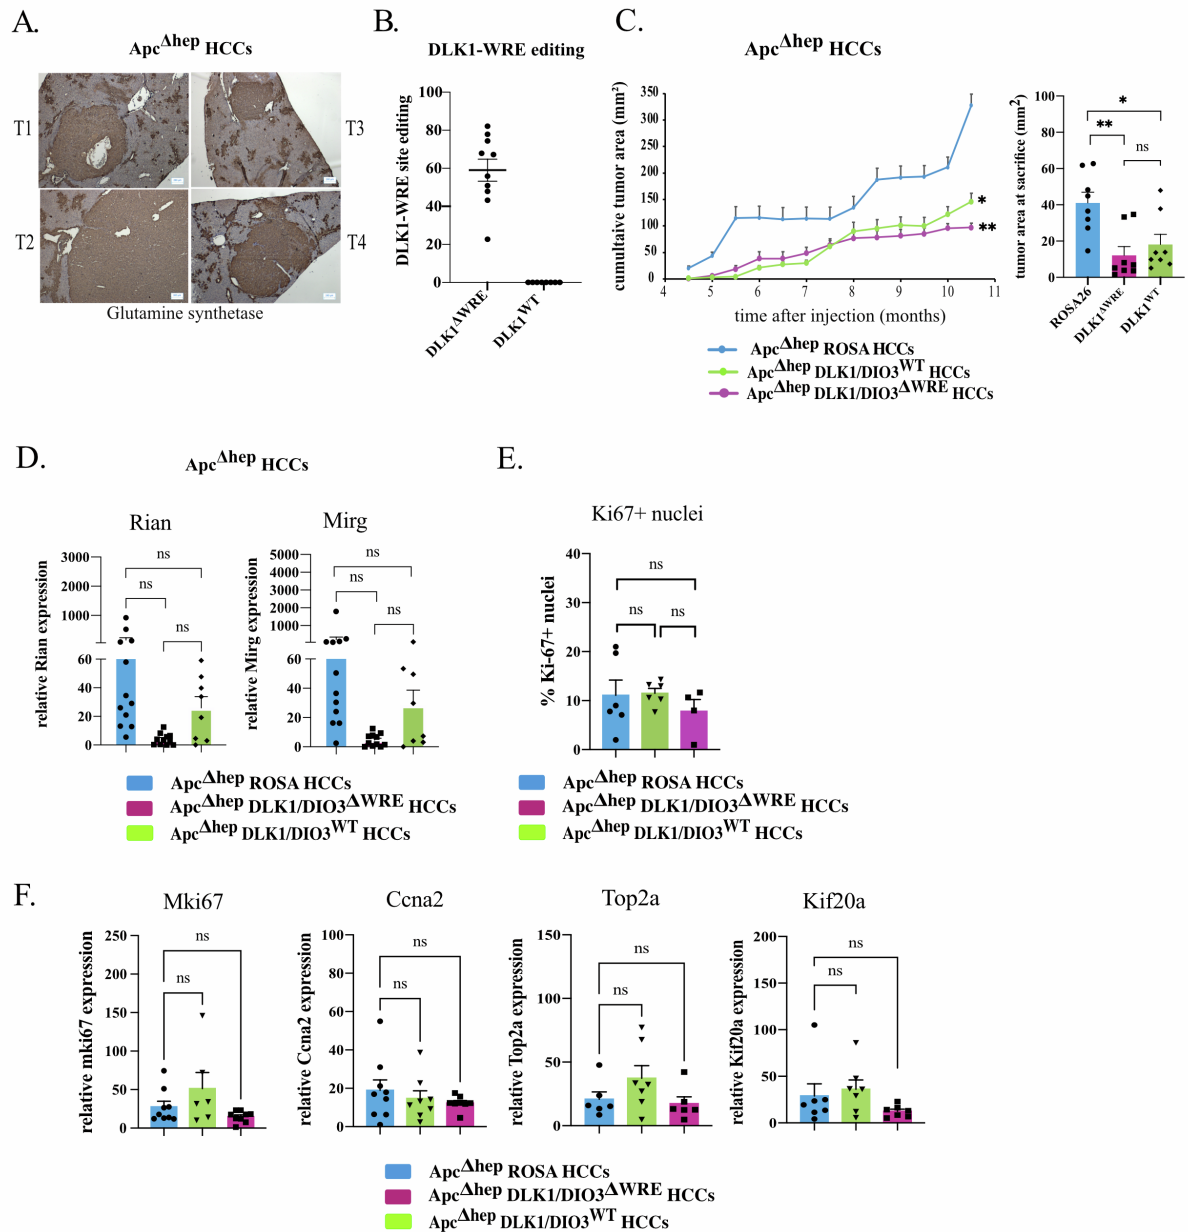

Figure S6

**Figure S6: DLK1-WRE site editing slows *Apc*<sup>Δhep</sup> HCC growth but does not affect the expression of the identified actors involved in G2/M phase**

**A:** Examples of glutamine synthetase staining of *Apc*<sup>Δhep</sup> HCCs; **B:** analysis of tumor editing by PCR band quantification with ImageJ in *Apc*<sup>Δhep</sup> HCC; **C:** Progression of cumulative tumor areas (left panel) and areas at sacrifice (right panel) for *Apc*<sup>Δhep</sup> HCC; **D:** RT-qPCR analysis of *Rian* and *Mirg* expression in *Apc*<sup>Δhep</sup> HCC compared to their adjacent non-tumor tissues; **E:** Percentage of Ki-67+ hepatocytes in *Apc*<sup>Δhep</sup> HCC; **F:** Expression of *Mki67*, *Ccna2*, *Top2a*, and

*Kif20a* determined by RT-qPCR relative to their adjacent non-tumor tissues in *Apc*<sup>Δhep</sup> HCC. Levels of significance: \* $p < 0.05$ , \*\*  $p < 0.01$ , ns: non-significant (Kruskal-Wallis), with error bars representing s.e.m..



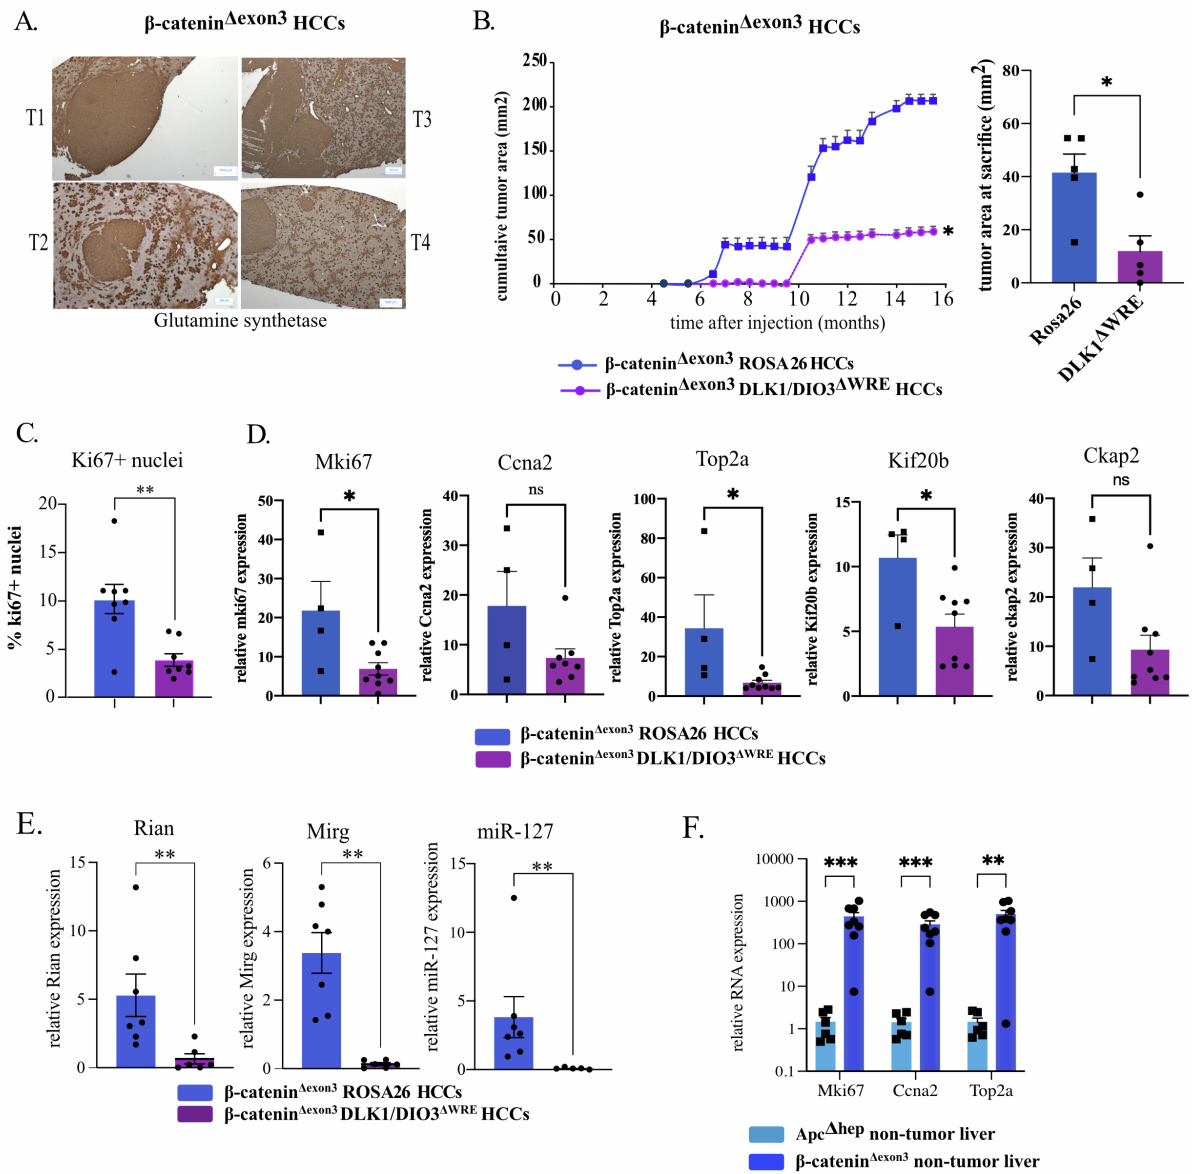

Figure S7

**Figure S7: DLK1-WRE site editing slows  $\beta$ -catenin $\Delta$ Exon3 HCC growth**

**A:** Examples of glutamine synthetase staining of  $\beta$ -catenin $\Delta$ Exon3 HCC; **B:** Progression of cumulative tumor areas (left panel) and areas at sacrifice (right panel) for  $\beta$ -catenin $\Delta$ Exon3 HCC; **C:** Percentage of Ki-67+ hepatocytes in  $\beta$ -catenin $\Delta$ Exon3 HCC; **D:** Expression of *Mki67*, *Ccna2*, *Top2a*, *Kif20b*, and *Ckap2* determined by RT-qPCR in  $\beta$ -catenin $\Delta$ Exon3 HCC relative to their adjacent non-tumor tissues; **E:** RT-qPCR analysis of *Rian*, *Mirg* and miR-127 in  $\beta$ -catenin $\Delta$ Exon3 HCC compared to their adjacent non-tumor tissues; **F:** RT-qPCR analysis of *Mki67*, *Ccna2* and *Top2a* in Apc $\Delta$ hep and  $\beta$ -catenin $\Delta$ Exon3 non-tumor tissues. Levels of significance: \*p<0.05,

\*\*p<0.01, \*\*\* p<0.005, ns: non-significant (Mann-Whitney), with error bars representing s.e.m..

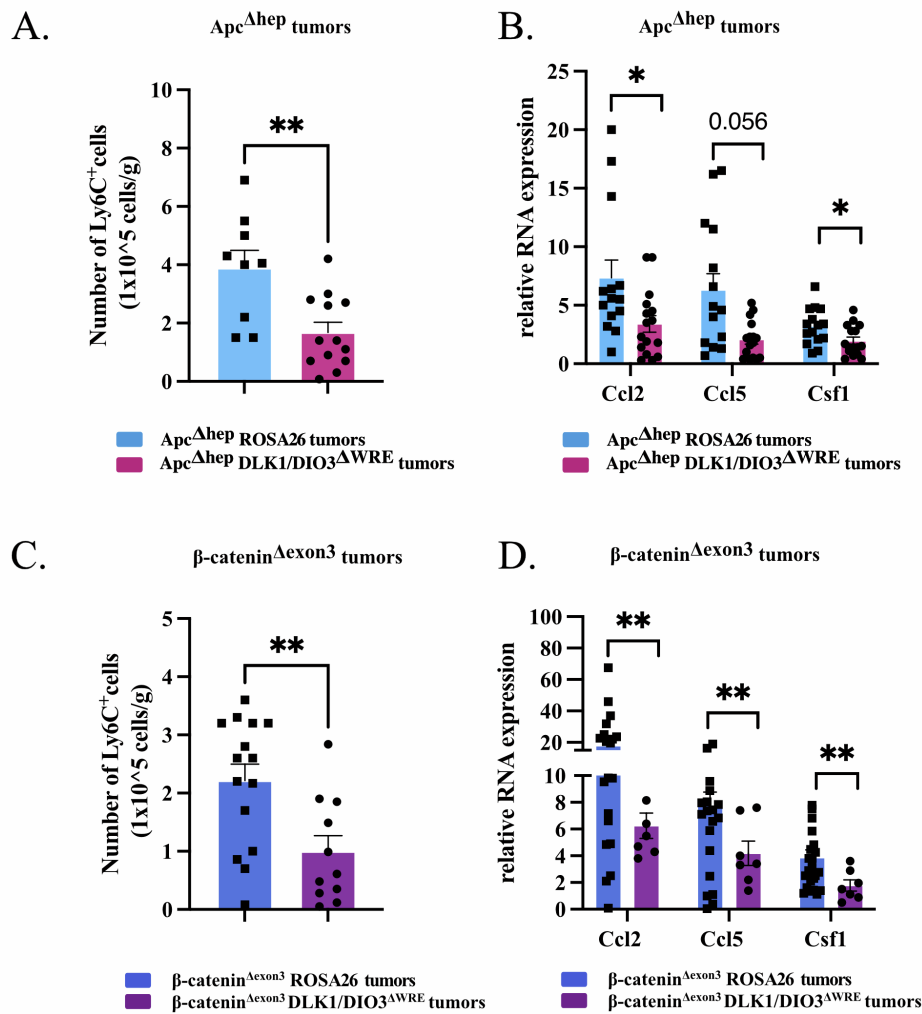

Figure S8

**Figure S8: DLK1-WRE site editing impairs monocyte recruitment in  $Apc^{\Delta hep}$  and  $\beta$ -catenin<sup>ΔExon3</sup> tumors.**

**A, C:** Absolute number of Ly6C<sup>+</sup> monocytes relative to tissue weight in  $Apc^{\Delta hep}$  (**A**) and  $\beta$ -catenin<sup>ΔExon3</sup> tumors (**C**); **B, D:** RT-qPCR analysis of *Ccl2*, *Ccl5*, and *Csf1* relative to their adjacent non-tumor tissues in  $Apc^{\Delta hep}$  tumors (**B**) and  $\beta$ -catenin<sup>ΔExon3</sup> tumors (**D**). Levels of significance: \* $p < 0.05$ , \*\*  $p < 0.01$  (Mann-Whitney), with error bars representing s.e.m..

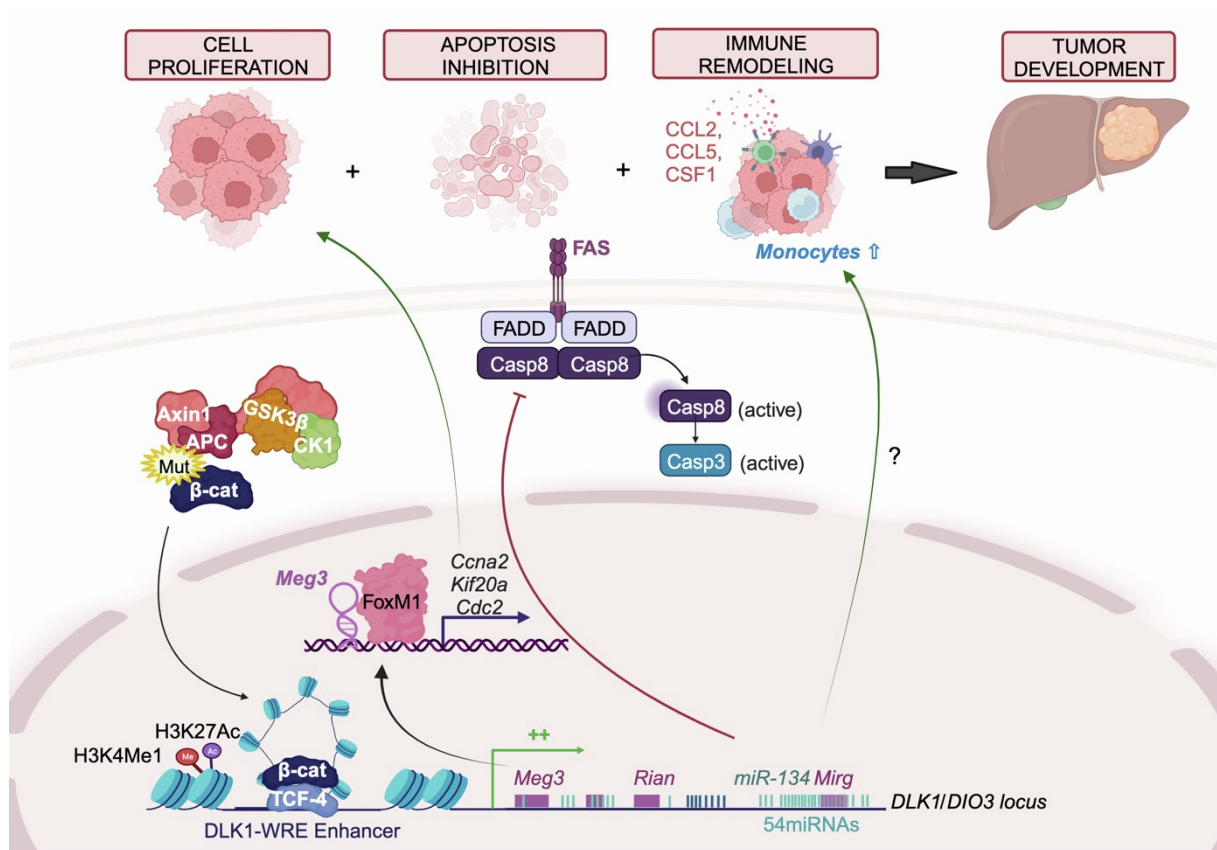

**Figure S9: Graphical abstract**

Figure made with Biorender.

**References:**

1. Hirsch, T. Z., Pilet, J., Morcrette, G., Roehrig, A., Monteiro, B. J. E., Molina, L., Bayard, Q., Trepo, E., Meunier, L., Caruso, S. *et al.* Integrated Genomic Analysis Identifies Driver Genes and Cisplatin-Resistant Progenitor Phenotype in Pediatric Liver Cancer. (2021). *Cancer Discov.* 11, 2524-2543, doi:10.1158/2159-8290.CD-20-1809
2. Loesch, R., Caruso, S., Paradis, V., Godard, C., Gougelet, A., Renault, G., Picard, S., Tanaka, I., Renoux-Martin, Y., Perret, C. *et al.* Deleting the beta-catenin degradation domain in mouse hepatocytes drives hepatocellular carcinoma or hepatoblastoma-like tumor growth. (2022). *J Hepatol.* doi:10.1016/j.jhep.2022.02.023
